# Supplementary material for: Natriuretic Peptides—New Targets for Neurocontrol of Blood Pressure via Baroreflex Afferent Pathway
Source: MDPI journal article supplement (doi:10.3390/ijms232113619), 2022-11-07

## **Online only Supplemental Materials**

### **Natriuretic Peptides – New Targets for Neurocontrol of Blood Pressure via Baroreflex**

#### **Afferent Pathway**

Li Xin-Yu<sup>†</sup>, Cui Ya-Li<sup>†</sup>, Zhang Qing<sup>†</sup>, Li Qing-Yuan, Cheng Meng-Xing, Sun Jie, Cui Chang-Peng,

Fan Xiong-Xiong, Li Bai-Yan\*

<sup>1</sup>Department of Pharmacology (State-Province Key Laboratories of Biomedicine-Pharmaceutics of China, Key Laboratory of Cardiovascular Medicine Research, Ministry of Education), College of Pharmacy, Harbin Medical University, Harbin, China

**Short running title:** NPs & BRx afferent function

<sup>†</sup> These authors contributed equally to this work.

Correspondence to Bai-Yan Li, Department of Pharmacology, Harbin Medical University, 157

Bao-Jian Rd, Harbin 150081, China; Ph/Fax: 86 451-8667-1354, E-mail: [liby@ems.hrbmu.edu.cn](mailto:liby@ems.hrbmu.edu.cn).

**This PDF file includes:**

**Tables. S1 to S3 and Figures. S1 to S3**

**Supplemental Tables**

**Table S1: Chemicals used in this experiment.**

| Chemicals                   | Source             | Catalog # |
|-----------------------------|--------------------|-----------|
| ANP                         | NJ Peptide Biomart | Pep-06338 |
| BNP                         | Cayman             | 24541     |
| CNP                         | NJ Peptide Biomart | Pep-07437 |
| Anantnin                    | NJ Peptide Biomart | Pep-06271 |
| Sphingosine-1-phosphate     | Cayman             | 62570     |
| cANP <sup>4-23</sup>        | NJ Peptide Biomart | Pep-06340 |
| ACN                         | FuYu Chemical      | 75-05-8   |
| NaOH                        | Sigma-Aldrich      | S8045     |
| Phenylephrine               | Sigma-Aldrich      | P1240000  |
| Pentobarbital sodium salt   | Sigma-Aldrich      | P11011    |
| Chloral hydrate             | Aladdin            | C104202   |
| RIPA lysis buffer           | Beyotime           | P0013B    |
| SDS                         | Beyotime           | P0013G    |
| Protease Inhibitor Cocktail | MedChemExpress     | HY-K0010  |
| DAPI                        | Beyotime           | C1005     |
| Trizol Reagent              | Invitrogen         | 15596-018 |

**Table S2. The list of all qRT-PCR primers used in this investigation.**

| Gene List | Primers        | Sequences                       |
|-----------|----------------|---------------------------------|
| ANP       | Forward Primer | 5'-GCCGGTAGAAGATGAGGTCA-3'      |
|           | Reverse Primer | 5'-GGGCTCCAATCCTGTCAATC-3'      |
| BNP       | Forward Primer | 5'-CAGAGCTGGGGAAAGAAGAG-3'      |
|           | Reverse Primer | 5'-GGACCAAGGCCCTACAAAAGA-3'     |
| CNP       | Forward Primer | 5'-GGAGCCAATCTCAAGGGA-3'        |
|           | Reverse Primer | 5'-TGCCGCCTTTGTATTTGC-3'        |
| NPRA      | Forward Primer | 5'-CCTTTCAGGCTGCCAAAAT-3'       |
|           | Reverse Primer | 5'-ATCCTCCACGGTGAAGTTGA-3'      |
| NPRB      | Forward Primer | 5'-TCTATGCCAAGAAGCTGTGG-3'      |
|           | Reverse Primer | 5'-CCAGGCCTTCCAAGTAGAAA-3'      |
| NPRC      | Forward Primer | 5'-GGACCGCGAAGCCTGAGT-3'        |
|           | Reverse Primer | 5'-ATGGACACCTGCCCCGGCGATACCT-3' |
| GAPDH     | Forward Primer | 5'-ATGACTCTACCCACGGCAAG-3'      |
|           | Reverse Primer | 5'-TACTCAGCACCAGCATCACC-3'      |

**Table S3: Antibodies used in this experiment.**

| Antibodies                                  | Source          | Catalog #  | RRID       |
|---------------------------------------------|-----------------|------------|------------|
| Rabbit polyclonal anti-NPRA                 | NOVUS           | NBP1-31333 | AB_2155457 |
| Mouse polyclonal anti-NPRB                  | SANTA CRUZ      | sc-293451  | AB_2847874 |
| Rabbit polyclonal anti-NPRC                 | NOVUS           | NBP1-31365 | AB_2155906 |
| Mouse monoclonal anti-GAPDH                 | ABclonal        | ac002      | AB_2736879 |
| Rabbit polyclonal anti-HCN1                 | OriGene         | TA328955   | AB_2847873 |
| Mouse monoclonal anti-HCN1                  | OriGene         | TA326543   | AB_2847872 |
| IRDye® 800CW Goat anti-Rabbit IgG (H + L)   | LI-COR          | 926-32211  | AB_621843  |
| IRDye® 800CW Goat anti-Mouse IgG (H + L)    | LI-COR          | 926-32210  | AB_621842  |
| Alexa Fluor® 488 goat anti-rabbit IgG (H+L) | Life Technology | A-11034    | AB_2576217 |
| Alexa Fluor® 488 goat anti-mouse IgG (H+L)  | Life Technology | A-11029    | AB_138404  |
| Alexa Fluor® 594 goat anti-rabbit IgG (H+L) | Life Technology | A-11037    | AB_2534095 |
| Alexa Fluor® 594 goat anti-mouse IgG (H+L)  | Life Technology | A-11032    | AB_2534091 |

## Supplemental Figures

### Figure S1: Blood pressure (BP) of rats of different gender groups under physiological condition.

**(A)** Changes in rat systolic blood pressure (SBP) after ovariectomy for 4 weeks. Results were analyzed using two-tailed unpaired Student's *t*-test and one-way ANOVA between and among groups, and averaged data was presented as mean  $\pm$  SD.  $**P < 0.01$  vs. male rats,  $^{##}P < 0.01$  vs. female rats,  $n = 10$ . **(B)** Mean arterial pressure (MAP) of rats before nodose ganglia (NG) microinjection. Averaged data was presented as mean  $\pm$  SD.  $**P < 0.01$  vs. male rats(M),  $^{##}P < 0.01$  vs. female rats (F), from 6 rats for male and female group, and 5 rats for OVX group.

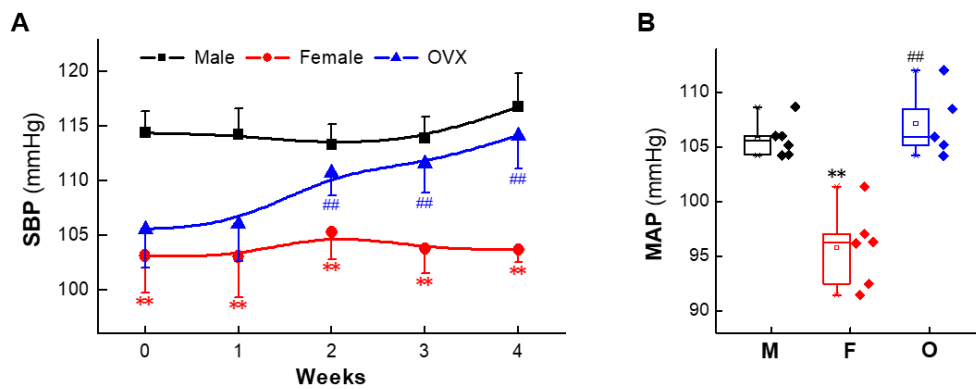

**Figure S2: Blood pressure (BP) of rats of different gender groups under pathophysiological condition. (A)** Changes in rat systolic blood pressure (SBP) after high fructose-drinking for 4 weeks. Averaged data were presented as mean  $\pm$  SD.  $**P < 0.01$  vs. M-CTL,  $^{##}P < 0.01$  vs. F-CTL,  $^{\Delta}P < 0.05$ ,  $^{\Delta\Delta}P < 0.01$  vs. M-HFD,  $n = 10$ . **(B)** Mean arterial pressure (MAP) of rats before nodose ganglia (NG) microinjection. Averaged data was presented as mean  $\pm$  SD.  $**P < 0.01$  vs. male-control rats (MC),  $^{##}P < 0.01$  vs. female-control rats (FC),  $^{\Delta\Delta}P < 0.01$  vs. male-HFD rats (MH), from 5 rats for each MH and FH group, 6 rats for MC group, and 7 rats for FC group..

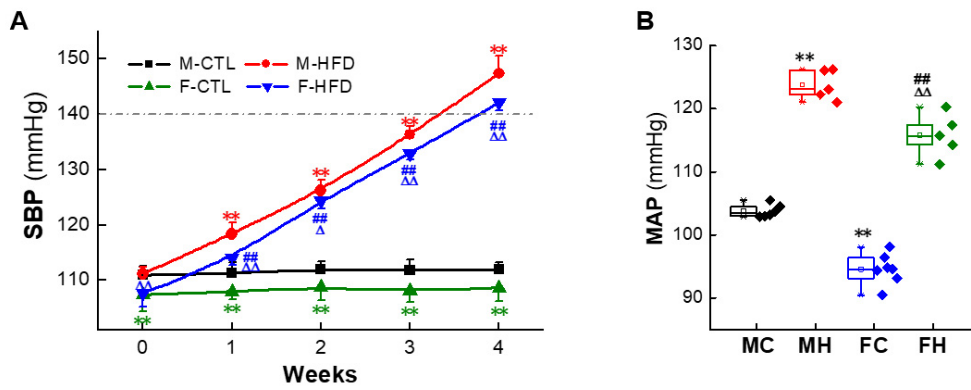

**Figure S3: The baroreceptor sensitivity (BRS) baseline before natriuretic peptides (NPs) intravenous injection.** Averaged data were presented as mean  $\pm$  SD.  $**P < 0.01$  vs. male-control rats (MC),  $^{##}P < 0.01$  vs. female-control rats (FC),  $^{\Delta\Delta}P < 0.01$  vs. male-HFD rats (MH),  $n = 15$  for each group.

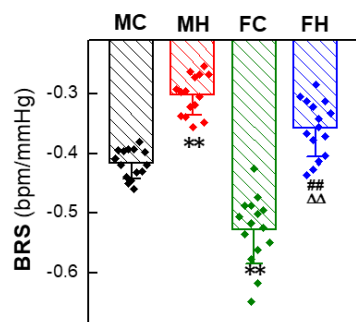

Supplement: s1 [file s1]
